# Supplementary material for: Assessment of Nicotine and Cannabis Vaping and Respiratory Symptoms in Young Adults
Source: PubMed Central journal article supplement (PMC7756238; doi:10.1001/jamanetworkopen.2020.30189), 2020-12-22
Supplement: jamanetwopen-e2030189-s001.pdf [file jamanetwopen-e2030189-s001.pdf]

## Supplemental Online Content

Braymiller JL, Barrington-Trimis JL, Leventhal AM, et al. Assessment of nicotine and cannabis vaping and respiratory symptoms in young adults. *JAMA Netw Open*. 2020;3(12):e2030189.  
doi:10.1001/jamanetworkopen.2020.30189

**eTable 1.** Sample characteristics for participants in the analytic sample compared to non-participants

**eTable 2.** Co-occurrence of nicotine vaping, cannabis vaping, cigarette smoking, and combustible cannabis use in the past 6 months

**eAppendix.**

This supplemental material has been provided by the authors to give readers additional information about their work.

**eTable 1.** Sample characteristics for participants in the analytic sample compared to non-participants

|                                            | Analytic Sample<br>N=2,553 | Completed Wave 9, but NO resp. data<br>N=148 | p-value     | Did NOT Complete Wave 9<br>N= 654 | p-value          |
|--------------------------------------------|----------------------------|----------------------------------------------|-------------|-----------------------------------|------------------|
| <b>Sex</b>                                 |                            |                                              | <b>0.00</b> |                                   | <b>&lt;.0001</b> |
| Female                                     | 57.9%                      | 46.0%                                        |             | 39.9%                             |                  |
| Male                                       | 42.2%                      | 54.1%                                        |             | 60.1%                             |                  |
| <b>Race/Ethnicity</b>                      |                            |                                              | <b>0.61</b> |                                   | <b>0.01</b>      |
| Hispanic                                   | 47.3%                      | 48.3%                                        |             | 49.3%                             |                  |
| NH Asian                                   | 18.1%                      | 12.6%                                        |             | 12.1%                             |                  |
| NH White                                   | 16.5%                      | 14.0%                                        |             | 15.8%                             |                  |
| NH Multiracial                             | 6.6%                       | 5.6%                                         |             | 6.9%                              |                  |
| NH Black                                   | 4.8%                       | 5.6%                                         |             | 5.7%                              |                  |
| NH Native Hawaiian or Pacific Islander     | 4.3%                       | 4.9%                                         |             | 3.2%                              |                  |
| NH Another racial/ethnic category          | 2.4%                       | 5.6%                                         |             | 5.7%                              |                  |
| <b>Nicotine Vaping at Wave 9</b>           |                            |                                              | <b>0.01</b> |                                   |                  |
| Never used                                 | 57.1%                      | 45.2%                                        |             | --                                |                  |
| Lifetime, but not past 6 months            | 10.5%                      | 19.9%                                        |             | --                                |                  |
| Past 6 months, but not P30D                | 8.9%                       | 8.9%                                         |             | --                                |                  |
| 1-2 days in the P30D                       | 7.8%                       | 6.2%                                         |             | --                                |                  |
| 3+ days in the P30D                        | 15.7%                      | 19.9%                                        |             | --                                |                  |
| <b>Cannabis Vaping at Wave 9</b>           |                            |                                              | <b>0.13</b> |                                   |                  |
| Never used                                 | 61.6%                      | 55.6%                                        |             | --                                |                  |
| Lifetime, but not past 6 months            | 8.4%                       | 13.3%                                        |             | --                                |                  |
| Past 6 months, but not P30D                | 20.1%                      | 17.8%                                        |             | --                                |                  |
| 1-2 days in the P30D                       | 3.7%                       | 4.4%                                         |             | --                                |                  |
| 3+ days in the P30D                        | 6.3%                       | 8.9%                                         |             | --                                |                  |
| <b>Combustible Cigarette Use at Wave 9</b> |                            |                                              | <b>0.01</b> | --                                |                  |
| Never used                                 | 76.9%                      | 63.0%                                        |             | --                                |                  |
| Lifetime, but not past 6 months            | 10.6%                      | 17.1%                                        |             | --                                |                  |
| Past 6 months, but not P30D                | 4.0%                       | 4.1%                                         |             | --                                |                  |
| 1-2 days in the P30D                       | 4.8%                       | 8.9%                                         |             | --                                |                  |
| 3+ days in the P30D                        | 3.8%                       | 6.9%                                         |             | --                                |                  |
| <b>Combustible Cannabis Use</b>            |                            |                                              | <b>0.40</b> | --                                |                  |
| Never used                                 | 51.3%                      | 44.8%                                        |             | --                                |                  |
| Lifetime, but not past 6 months            | 12.7%                      | 16.6%                                        |             | --                                |                  |
| Past 6 months, but not P30D                | 7.1%                       | 6.2%                                         |             | --                                |                  |
| 1-2 days in the P30D                       | 8.6%                       | 9.0%                                         |             | --                                |                  |
| 3+ days in the P30D                        | 20.3%                      | 23.5%                                        |             | --                                |                  |

**eTable 2.** Co-occurrence of nicotine vaping, cannabis vaping, cigarette smoking, and combustible cannabis use in the past 6 months.

|                                 | <b>Nicotine Vaping</b> | <b>Cannabis Vaping</b> | <b>Cigarette Smoking</b> | <b>Combustible Cannabis Use</b> |
|---------------------------------|------------------------|------------------------|--------------------------|---------------------------------|
| <b>Nicotine Vaping</b>          | --                     | --                     | --                       | --                              |
| <b>Cannabis Vaping</b>          | 510 (67.4%)            | --                     | --                       | --                              |
| <b>Cigarette Smoking</b>        | 266 (32.2%)            | 197 (26.8%)            | --                       | --                              |
| <b>Combustible Cannabis Use</b> | 588 (71.2%)            | 645 (88.0%)            | 250 (77.9%)              | --                              |

Note. Frequencies and column percentages for a 'yes' response are reported for each substance use behavior.

**eAppendix**  
**QUESTIONNAIRE**

**Respiratory Outcomes.**

**Bronchitic Symptoms**

1. During the last 12 months, have you had a cough first thing in the morning, that lasted for as much as 3 months in a row?

- No
- Yes
- Don't know

2. During the last 12 months, have you had a cough at any other times of the day that lasted for as much as 3 months in a row?

- No
- Yes
- Don't know

3. Other than with colds, do you usually seem congested in the chest or bring up phlegm?

- No
- Yes
- Don't know

4. During the past 12 months, have you had bronchitis?

- No
- Yes
- Don't know

**Wheeze**

Have you had wheezing or whistling in the chest in the last 12 months?

- No
- Yes

**Shortness of Breath**

Are you troubled by shortness of breath when hurrying on level ground or walking up a slight hill?

- No
- Yes

**Substance Use Information.**

1. Have you ever used the following substances in your life?

|                                                                                                         | No                       | Yes, but not in the last 6 months | Yes, in the last 6 months |
|---------------------------------------------------------------------------------------------------------|--------------------------|-----------------------------------|---------------------------|
| Any electronic cigarette <b>with nicotine</b> ( <i>e-cigs, personal vaporizer, PV</i> )                 | <input type="checkbox"/> | <input type="checkbox"/>          | <input type="checkbox"/>  |
| Juul or similar device                                                                                  | <input type="checkbox"/> | <input type="checkbox"/>          | <input type="checkbox"/>  |
| Other electronic vaping device                                                                          | <input type="checkbox"/> | <input type="checkbox"/>          | <input type="checkbox"/>  |
| Electronic device to vape <b>THC or hash oil</b> ( <i>liquid pot, cannabis oil, weed pen, PAX Era</i> ) | <input type="checkbox"/> | <input type="checkbox"/>          | <input type="checkbox"/>  |
| Dabbing marijuana concentrates ( <i>Wax, shatter, budder, butane hash oil, BHO, concentrates</i> )      | <input type="checkbox"/> | <input type="checkbox"/>          | <input type="checkbox"/>  |
| Cigarettes ( <i>Marlboro, Camel, Newport, etc.</i> )                                                    | <input type="checkbox"/> | <input type="checkbox"/>          | <input type="checkbox"/>  |
| Smoking marijuana ( <i>joints, marijuana cigarettes</i> )                                               | <input type="checkbox"/> | <input type="checkbox"/>          | <input type="checkbox"/>  |
| Blunts ( <i>marijuana rolled in tobacco leaf or cigar casing</i> )                                      | <input type="checkbox"/> | <input type="checkbox"/>          | <input type="checkbox"/>  |

2. In the last 30 days, how many total days have you used...?

|                                                                                                         | 0 days                   | 1 or 2 days              | 3 to 5 days              | 6 to 9 days              | 10 to 19 days            | 20-29 days               | All 30 days              |
|---------------------------------------------------------------------------------------------------------|--------------------------|--------------------------|--------------------------|--------------------------|--------------------------|--------------------------|--------------------------|
| Any electronic cigarette <b>with nicotine</b> ( <i>e-cigs, personal vaporizer, PV</i> )                 | <input type="checkbox"/> | <input type="checkbox"/> | <input type="checkbox"/> | <input type="checkbox"/> | <input type="checkbox"/> | <input type="checkbox"/> | <input type="checkbox"/> |
| Juul or similar device                                                                                  | <input type="checkbox"/> | <input type="checkbox"/> | <input type="checkbox"/> | <input type="checkbox"/> | <input type="checkbox"/> | <input type="checkbox"/> | <input type="checkbox"/> |
| Other electronic vaping device                                                                          | <input type="checkbox"/> | <input type="checkbox"/> | <input type="checkbox"/> | <input type="checkbox"/> | <input type="checkbox"/> | <input type="checkbox"/> | <input type="checkbox"/> |
| Electronic device to vape <b>THC or hash oil</b> ( <i>liquid pot, cannabis oil, weed pen, PAX Era</i> ) | <input type="checkbox"/> | <input type="checkbox"/> | <input type="checkbox"/> | <input type="checkbox"/> | <input type="checkbox"/> | <input type="checkbox"/> | <input type="checkbox"/> |
| Dabbing marijuana concentrates ( <i>Wax, shatter, budder, butane hash oil, BHO, concentrates</i> )      | <input type="checkbox"/> | <input type="checkbox"/> | <input type="checkbox"/> | <input type="checkbox"/> | <input type="checkbox"/> | <input type="checkbox"/> | <input type="checkbox"/> |
| Cigarettes ( <i>Marlboro, Camel, Newport, etc.</i> )                                                    | <input type="checkbox"/> | <input type="checkbox"/> | <input type="checkbox"/> | <input type="checkbox"/> | <input type="checkbox"/> | <input type="checkbox"/> | <input type="checkbox"/> |
| Smoking marijuana ( <i>joints, marijuana cigarettes</i> )                                               | <input type="checkbox"/> | <input type="checkbox"/> | <input type="checkbox"/> | <input type="checkbox"/> | <input type="checkbox"/> | <input type="checkbox"/> | <input type="checkbox"/> |
| Blunts ( <i>marijuana rolled in tobacco leaf or cigar casing</i> )                                      | <input type="checkbox"/> | <input type="checkbox"/> | <input type="checkbox"/> | <input type="checkbox"/> | <input type="checkbox"/> | <input type="checkbox"/> | <input type="checkbox"/> |

**Demographics.**

What is your sex assigned at birth?

- Male
- Female

Are you Hispanic or Latino?

- Yes
- No

Which of the following races do you identify with? (Check all that apply)

- American Indian or Alaska Native
- Asian
- Black or African American
- Native Hawaiian or Pacific Islander
- White
- Multi-ethnic or Multi-racial
- Other (please specify)

Please specify the race(s) with which you identify: \_\_\_\_\_

Considering your own income and the income from any other people who help you, how would you describe your overall personal financial situation?

- Live comfortably
- Meet needs with a little left
- Just meet basic expenses
- Don't meet basic expenses

How tall are you?

Feet \_\_\_\_\_

Inches \_\_\_\_\_

How much do you weigh?

\_\_\_\_\_ pounds
